# Supplementary material for: Single-molecule mass measurements reveal distinct effects of sodium and potassium on mini-spidroin assembly
Source: Research Square preprint supplement (doi:10.21203/rs.3.rs-7639041/v1), 2025-10-10
Supplement: Supplementary file 1 [file 7a8df5866ae8800a30b03b13.docx]

Supplementary information to

**Single-molecule mass measurements reveal distinct effects of sodium and potassium on mini-spidroin assembly**

Hannah Osterholz, Shree Senthil Jeyalekshmy, Benjamin Schmuck, Tomas Bohn Pessatti, Justin.P. Benesch, Anna Rising, Axel Leppert, Michael Landreh

**
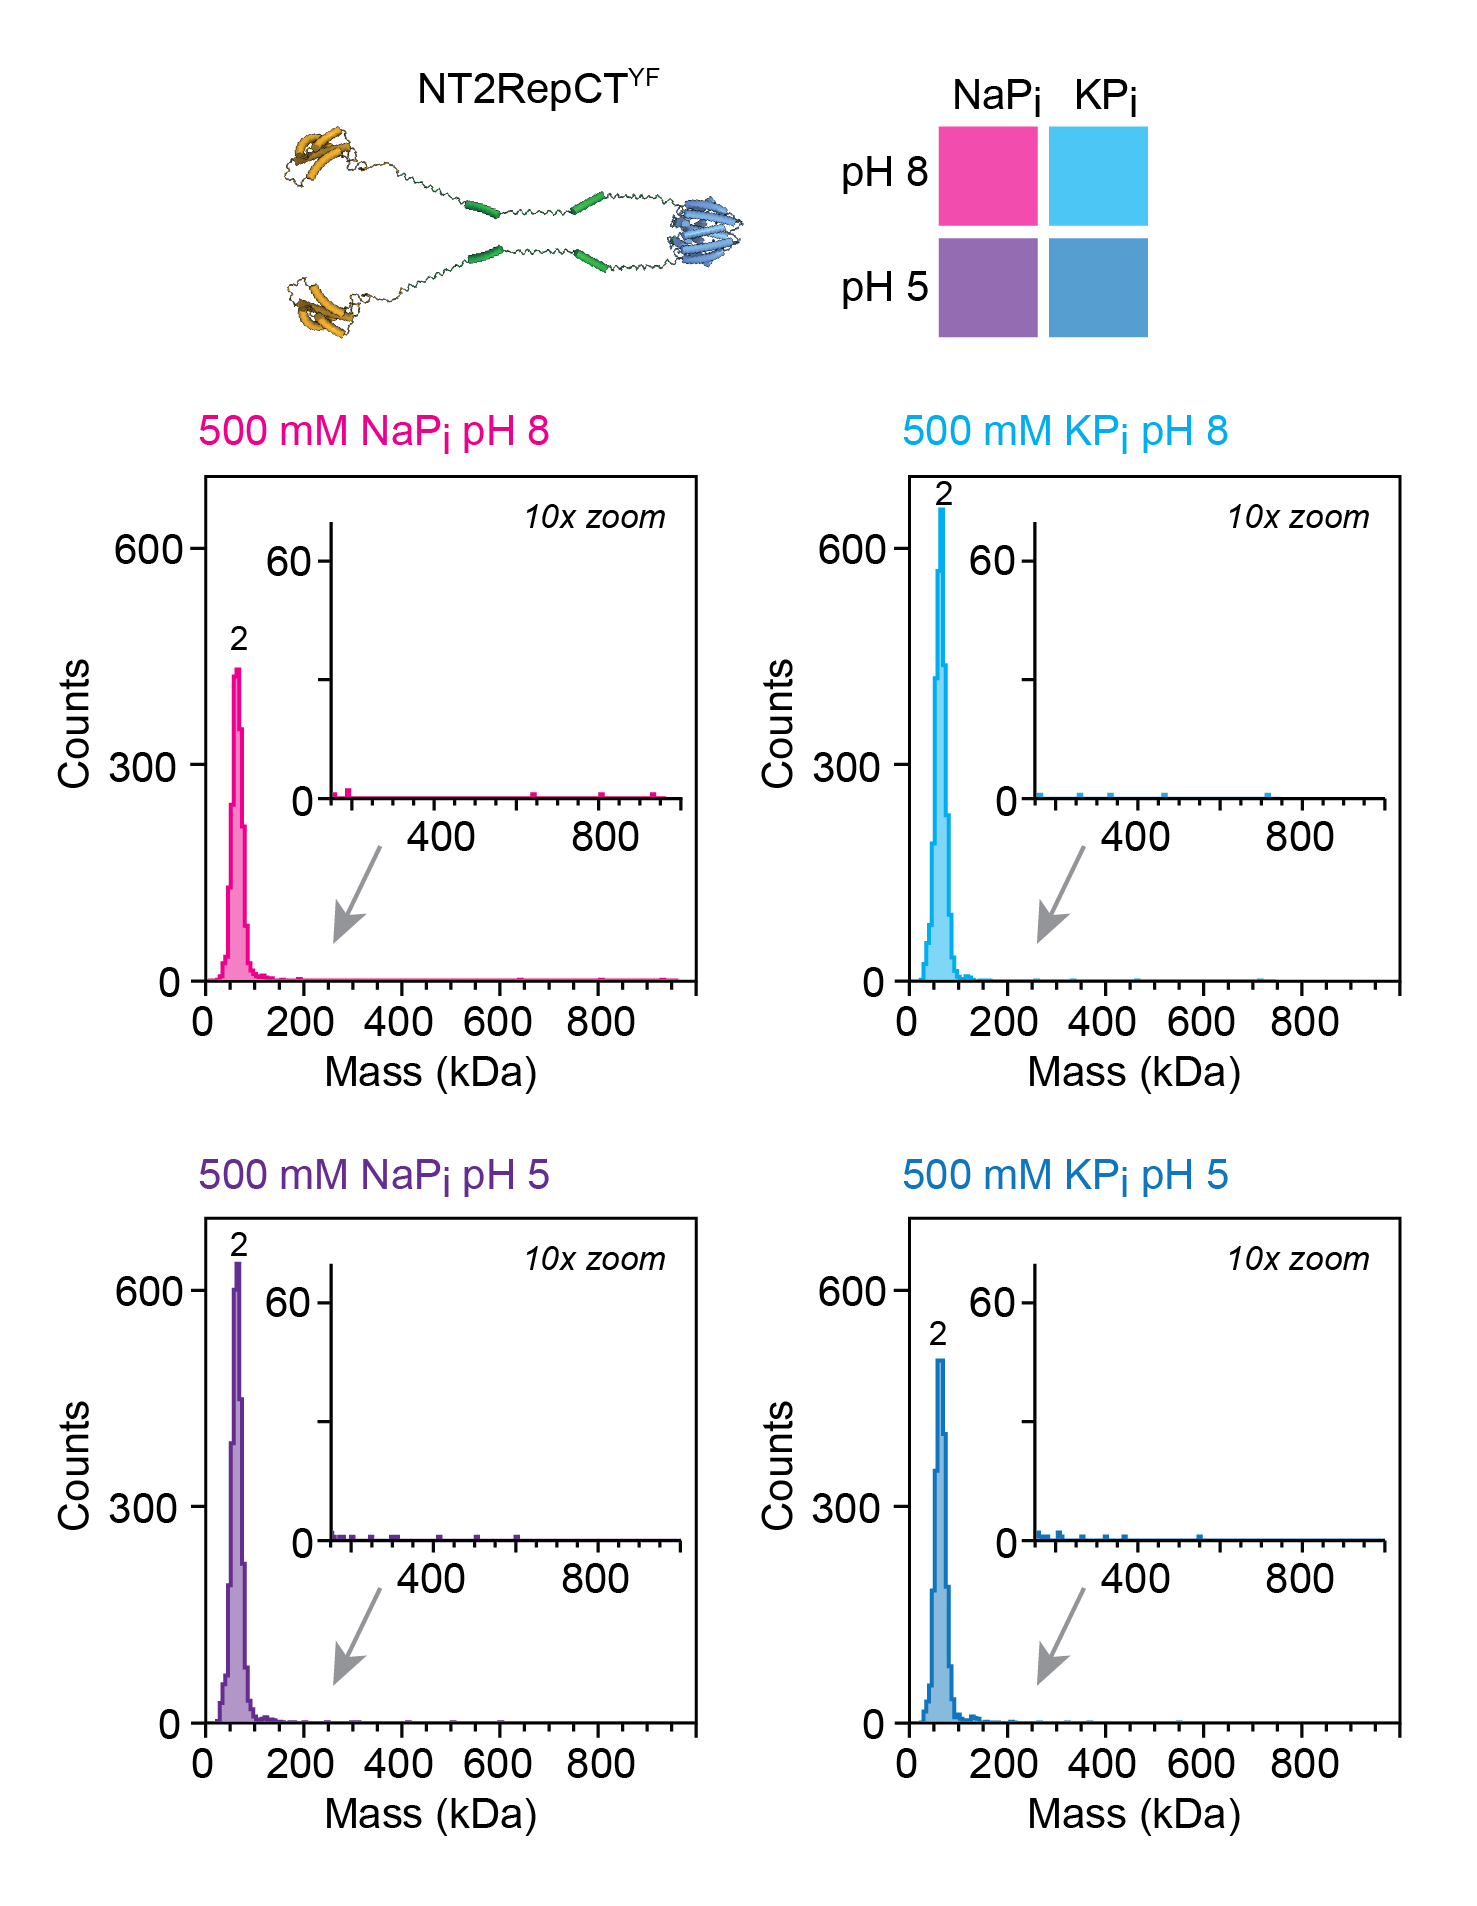
**

***Figure S1.*** *MP histograms of 10 nM NT2RepCTYF in 500 mM NaPi or KPi show exclusively spidroin dimers with no pronounced differences between conditions.*

*
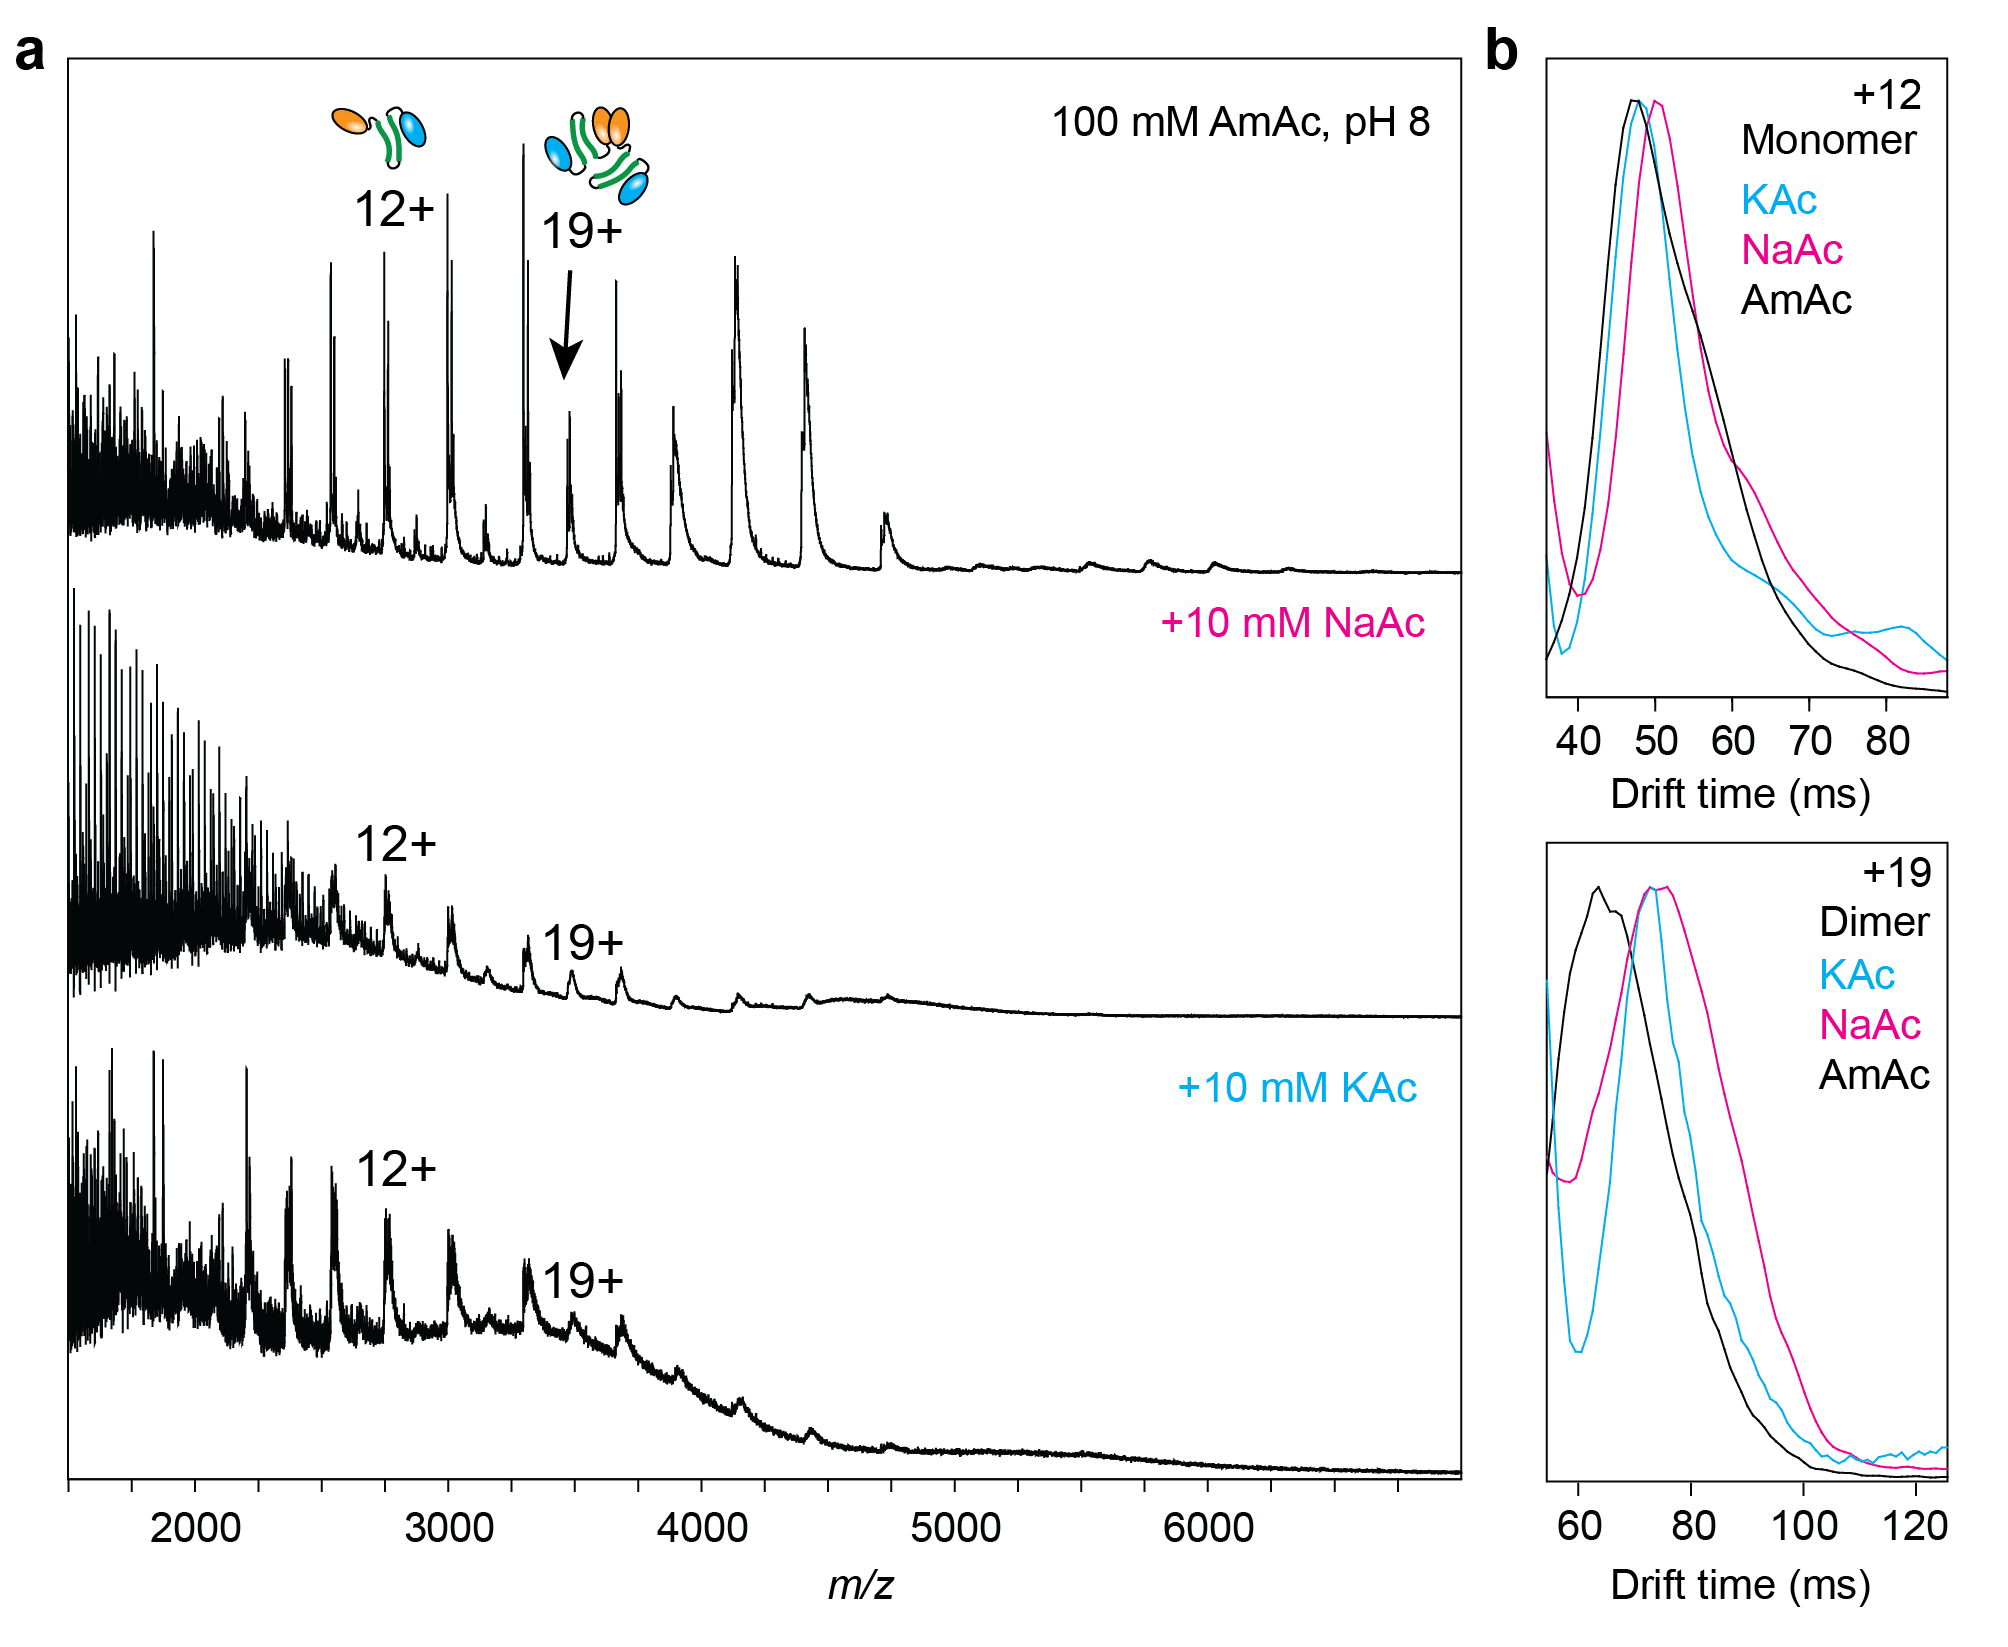
*

***Figure S2. Native IM-MS of NT2RepCTYF shows conformational effects of sodium and potassium. (a)*** *Mass spectra of NT2RepCTYF in 100 mM AmAc supplemented with NaAc or KAc show partial signal suppression but discernable peaks for the 12+ charge state of the monomer and the 19+ charge state of the dimer.* ***(b)*** *Comparison of the arrival time distributions for the 12+ monomer (top) or the 19+ dimer (bottom) at each condition shows a lower arrival time for the protein ionized in the presence of potassium (blue) compared to sodium (pink).*

**
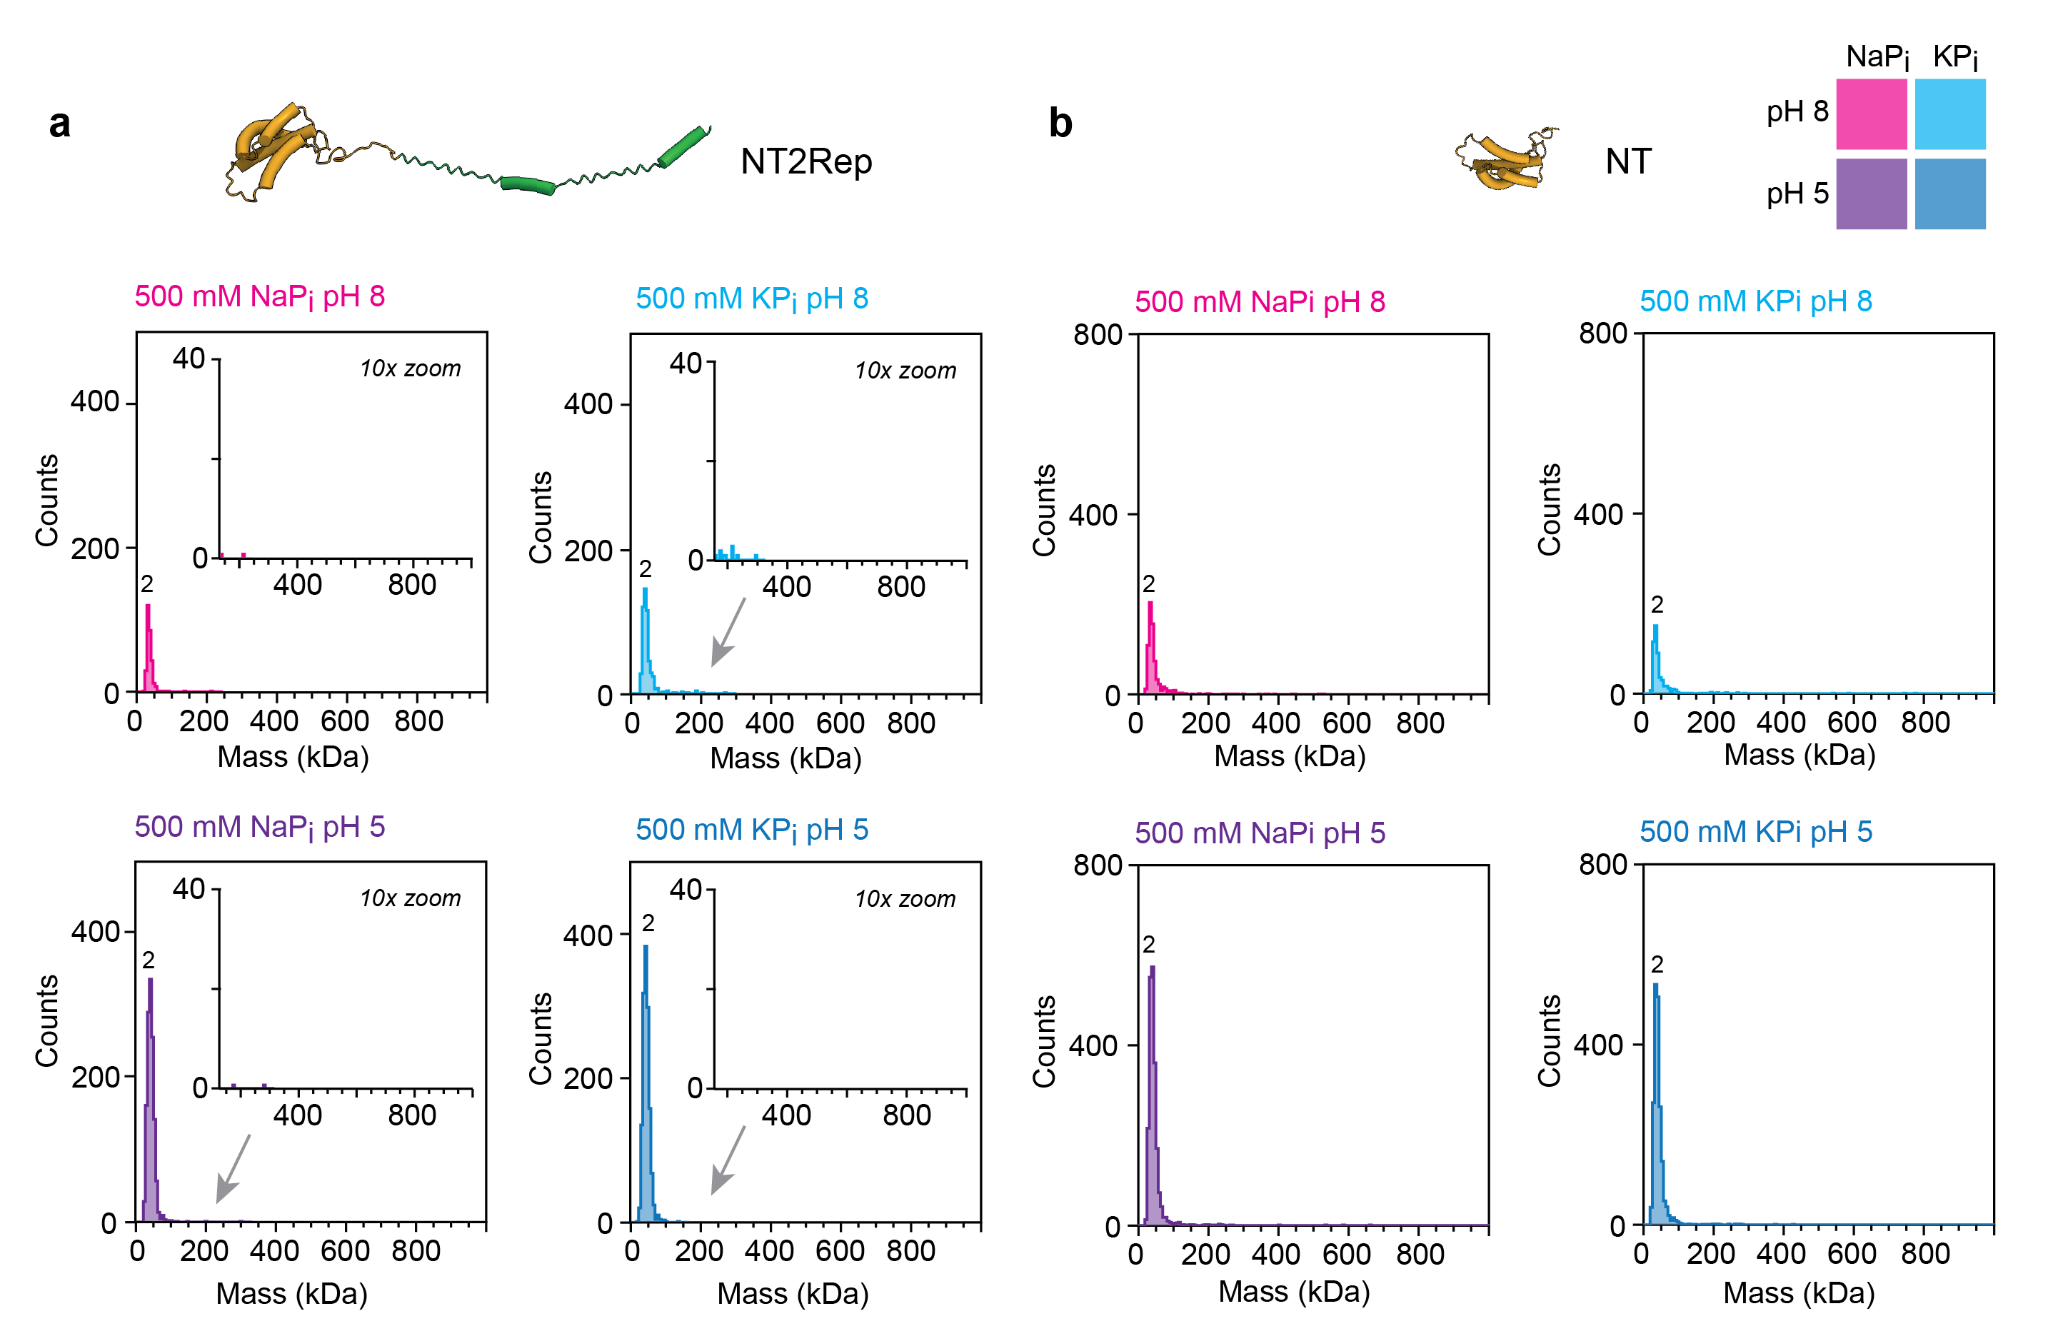
**

**Figure S3.** *MP histograms of NT2Rep in 500 mM NaPi or KPi show increased dimerization at pH 5, but no pronounced differences between NaPi or KPi.*
